# Supplementary material
Source: publisher figshare collection journal article supplement (https://sage.figshare.com/ndownloader/files/17890256)
Supplement: Supplementary file 1 [file 17890256]

| <b>Appendix A. International classification of disease codes utilized</b> |                                                   |                                                    |
|---------------------------------------------------------------------------|---------------------------------------------------|----------------------------------------------------|
| <b>Condition</b>                                                          | <b>Pre-Intervention<br/>Group<br/>(2012-2014)</b> | <b>Post-Intervention<br/>Group<br/>(2014-2016)</b> |
| Acute renal failure                                                       | ICD-9                                             | ICD-10                                             |
|                                                                           | 584.5                                             | N17.0                                              |
|                                                                           | 583.6, 584.6                                      | N17.1                                              |
|                                                                           | 583.7, 584.7                                      | N17.2                                              |
|                                                                           | 584.8                                             | N17.8                                              |
|                                                                           | 584.9                                             | N17.9                                              |
| Venous Thromboembolism                                                    | ICD-9                                             | ICD-10                                             |
|                                                                           | 453.77                                            | I82.2                                              |
|                                                                           | 453.3                                             | I82.3                                              |
|                                                                           | 453.40                                            | I82.4                                              |
|                                                                           | 453.80                                            | I82.6                                              |
|                                                                           | 453.84                                            | I82.A1                                             |
|                                                                           | 453.85                                            | I82.B1                                             |
|                                                                           | 453.86                                            | I82.C1                                             |
|                                                                           | 453.79                                            | I82.8                                              |
|                                                                           | 453.79                                            | I82.9                                              |
| Occurrence of infection                                                   | ICD-9                                             | ICD-10                                             |
| Abdominal abscess                                                         | K65.1                                             | K65.1                                              |
| Abdominal infection                                                       | K65.9                                             | K65.9                                              |
| Abscess between intestinal loops                                          | K63.0                                             | K63.0                                              |

|                                                           |              |              |
|-----------------------------------------------------------|--------------|--------------|
| Abscess of lung and mediastinum                           | J85.2, J85.3 | J85.2, J85.3 |
| Abscess of lung with pneumonia                            | J85.1        | J85.1        |
| Abscess of lung with pneumonia, unspecified<br>laterality | J85.1        | J85.1        |
| Abscess of male pelvis                                    | K65.1        | K65.1        |
| Abscess of middle lobe of right lung with<br>pneumonia    | J85.1        | J85.1        |
| Abscess of peritoneum                                     | K65.1        | K65.1        |
| Abscess of prostate                                       | N41.2        | N41.2        |
| Abscess of sigmoid colon due to diverticulitis            | K57.20       | K57.20       |
| Abscess of upper lobe of left lung with<br>pneumonia      | J85.1        | J85.1        |
| Abscess of upper lobe of left lung without<br>pneumonia   | J85.2        | J85.2        |
| Abscess of upper lobe of right lung with<br>pneumonia     | J85.1        | J85.1        |
| Abscess of upper lobe of right lung with<br>pneumonia     | J85.1        | J85.1        |
| Abscess of upper lobe of right lung without<br>pneumonia  | J85.2        | J85.2        |
| Abscess of upper lobe of right lung without<br>pneumonia  | J85.2        | J85.2        |
| Abscess, abdomen                                          | K65.1        | K65.1        |
| Abscess, intestinal                                       | K63.0        | K63.0        |
| Abscess, intestine                                        | K63.0        | K63.0        |

|                                                               |                 |                 |
|---------------------------------------------------------------|-----------------|-----------------|
| Abscess, intra-abdominal, postoperative                       | T81.4XXA, K65.1 | T81.4XXA, K65.1 |
| Abscess, intra-abdominal, postoperative,<br>initial encounter | T81.4XXA, K65.1 | T81.4XXA, K65.1 |
| Actinomycoses                                                 | A42.9           | A42.9           |
| Acute cholangitis                                             | K83.0           | K83.0           |
| Acute cystitis                                                | N30.00          | N30.00          |
| Acute cystitis with hematuria                                 | N30.01          | N30.01          |
| Acute inflammatory disease of uterus                          | N71.0           | N71.0           |
| Acute oophoritis                                              | N70.02          | N70.02          |
| Acute parametritis and pelvic cellulitis                      | N73.0           | N73.0           |
| Acute peritonitis                                             | K65.0           | K65.0           |
| Acute prostatitis                                             | N41.0           | N41.0           |
| Acute pyelonephritis                                          | N10             | N10             |
| Acute salpingitis                                             | N70.01          | N70.01          |
| Acute salpingitis and oophoritis                              | N70.03          | N70.03          |
| Adenoviral pneumonia                                          | J12.0           | J12.0           |
| Allergic Pneumonia                                            | J82             | J82             |
| Ascending cholangitis                                         | K83.0           | K83.0           |
| At risk for sepsis                                            | Z91.89          | Z91.89          |
| Atypical pneumonia                                            | J18.9           | J18.9           |
| Bacteremia due to Staphylococcus aureus<br>without sepsis     | R78.81          | R78.81          |
| Bacterial aspiration, pneumonia                               | J15.9           | J15.9           |
| Bacterial peritonitis                                         | K65.9           | K65.9           |
| Bacterial pneumonia                                           | J15.9           | J15.9           |

|                                                                              |         |         |
|------------------------------------------------------------------------------|---------|---------|
| Bacterial pneumonia, unspecified                                             | J15.9   | J15.9   |
| Basal pneumonia                                                              | J18.9   | J18.9   |
| Basal pneumonia of both lungs                                                | J18.9   | J18.9   |
| Beta-haemolytic group A streptococcal sepsis                                 | A41.9   | A41.9   |
| Beta-haemolytic group B streptococcal sepsis                                 | A41.9   | A41.9   |
| Beta-hemolytic group B streptococcal sepsis                                  | A40.1   | A40.1   |
| Bilateral pleural effusion                                                   | J90     | J90     |
| Bilateral pneumonia                                                          | J18.9   | J18.9   |
| Biliary cyst                                                                 | K83.5   | K83.5   |
| Bronchial pneumonia                                                          | J18.0   | J18.0   |
| Bronchopneumonia                                                             | J18.0   | J18.0   |
| Bronchopneumonia due to Achromobacter                                        | J15.6   | J15.6   |
| Bronchopneumonia due to Achromobacter species                                | J15.6   | J15.6   |
| Bronchopneumonia due to bacteria                                             | J15.9   | J15.9   |
| Bronchopneumonia due to group B Streptococcus                                | J15.3   | J15.3   |
| Bronchopneumonia due to Klebsiella pneumoniae                                | J15.0   | J15.0   |
| Bronchopneumonia due to methicillin resistant Staphylococcus aureus (MRSA)   | J15.212 | J15.212 |
| Bronchopneumonia due to methicillin susceptible Staphylococcus aureus (MSSA) | J15.211 | J15.211 |
| Bronchopneumonia due to Proteus mirabilis                                    | J15.6   | J15.6   |

|                                                                                 |         |         |
|---------------------------------------------------------------------------------|---------|---------|
| Bronchopneumonia due to Pseudomonas species                                     | J15.1   | J15.1   |
| Bronchopneumonia due to Staphylococcus aureus                                   | J15.211 | J15.211 |
| Bronchopneumonia due to Streptococcus pneumoniae                                | J13     | J13     |
| Calculus of gallbladder and bile duct without cholecystitis with obstruction    | K80.71  | K80.71  |
| Calculus of gallbladder and bile duct without cholecystitis without obstruction | K80.70  | K80.70  |
| Calculus of bile duct with acute and chronic cholecystitis with obstruction     | K80.47  | K80.47  |
| Calculus of bile duct with acute and chronic cholecystitis without obstruction  | K80.46  | K80.46  |
| Calculus of bile duct with acute and chronic cholangitis with obstruction       | K80.37  | K80.37  |
| Calculus of bile duct with acute and chronic cholangitis without obstruction    | K80.36  | K80.36  |
| Calculus of bile duct with acute cholangitis with obstruction                   | K80.33  | K80.33  |
| Calculus of bile duct with acute cholangitis without obstruction                | K80.32  | K80.32  |
| Calculus of bile duct with acute cholecystitis with obstruction                 | K80.43  | K80.43  |

|                                                                                                |        |        |
|------------------------------------------------------------------------------------------------|--------|--------|
| Calculus of bile duct with acute cholecystitis without obstruction                             | K80.42 | K80.42 |
| Calculus of bile duct with cholangitis, unspecified, without obstruction                       | K80.30 | K80.30 |
| Calculus of bile duct with cholecystitis, unspecified, with obstruction                        | K80.41 | K80.41 |
| Calculus of bile duct with chronic cholangitis with obstruction                                | K80.35 | K80.35 |
| Calculus of bile duct with chronic cholangitis without obstruction                             | K80.34 | K80.34 |
| Calculus of bile duct with chronic cholecystitis with obstruction                              | K80.45 | K80.45 |
| Calculus of bile duct with chronic cholecystitis without obstruction                           | K80.44 | K80.44 |
| Calculus of bile duct without cholangitis or cholecystitis with obstruction                    | K80.51 | K80.51 |
| Calculus of bile duct without cholangitis or cholecystitis without obstruction                 | K80.50 | K80.50 |
| Calculus of gallbladder and bile duct with acute and chronic cholecystitis with obstruction    | K80.67 | K80.67 |
| Calculus of gallbladder and bile duct with acute and chronic cholecystitis without obstruction | K80.66 | K80.66 |

|                                                                                            |        |        |
|--------------------------------------------------------------------------------------------|--------|--------|
| Calculus of gallbladder and bile duct with acute cholecystitis with obstruction            | K80.63 | K80.63 |
| Calculus of gallbladder and bile duct with acute cholecystitis without obstruction         | K80.62 | K80.62 |
| Calculus of gallbladder and bile duct with cholecystitis, unspecified, with obstruction    | K80.61 | K80.61 |
| Calculus of gallbladder and bile duct with cholecystitis, unspecified, without obstruction | K80.60 | K80.60 |
| Calculus of gallbladder and bile duct with chronic cholecystitis with obstruction          | K80.65 | K80.65 |
| Calculus of gallbladder and bile duct with chronic cholecystitis without obstruction       | K80.64 | K80.64 |
| Calculus of gallbladder with acute and chronic cholecystitis with obstruction              | K80.13 | K80.13 |
| Calculus of gallbladder with acute and chronic cholecystitis without obstruction           | K80.12 | K80.12 |
| Calculus of gallbladder with acute cholecystitis with obstruction                          | K80.01 | K80.01 |
| Calculus of gallbladder with acute cholecystitis without obstruction                       | K80.00 | K80.00 |
| Calculus of gallbladder with cholecystitis of other acuity with obstruction                | K80.19 | K80.19 |
| Calculus of gallbladder with chronic cholecystitis with obstruction                        | K80.11 | K80.11 |

|                                                                                              |         |         |
|----------------------------------------------------------------------------------------------|---------|---------|
| Calculus of gallbladder with chronic cholecystitis without obstruction                       | K80.10  | K80.10  |
| Calculus of gallbladder with other cholecystitis without obstruction                         | K80.18  | K80.18  |
| Calculus of gallbladder without cholecystitis with obstruction                               | K80.21  | K80.21  |
| Calculus of gallbladder without cholecystitis without obstruction                            | K80.20  | K80.20  |
| CAP (community acquired pneumonia)                                                           | J18.9   | J18.9   |
| CAP (community acquired pneumonia)                                                           | J18.9   | J18.9   |
| CAP (community acquired pneumonia) due to group B Streptococcus                              | J15.3   | J15.3   |
| CAP (community acquired pneumonia) due to Klebsiella pneumoniae                              | J15.0   | J15.0   |
| CAP (community acquired pneumonia) due to MRSA (methicillin resistant Staphylococcus aureus) | J15.212 | J15.212 |
| CAP (community acquired pneumonia) due to MSSA (methicillin sensitive Staphylococcus aureus) | J15.211 | J15.211 |
| CAP (community acquired pneumonia) due to Pneumococcus                                       | J13     | J13     |
| CAP (community acquired pneumonia) due to Pseudomonas species                                | J15.1   | J15.1   |
| Chlamydial pneumonia                                                                         | J16.0   | J16.0   |



|                                                        |         |         |
|--------------------------------------------------------|---------|---------|
| Cholangiolitis                                         | K83.0   | K83.0   |
| Cholangitis                                            | K83.0   | K83.0   |
| Cholangitis due to bile duct calculus with obstruction | K80.31  | K80.31  |
| Cholangitis, recurrent                                 | K83.0   | K83.0   |
| Choledocholithiasis with cholecystitis                 | K80.40  | K80.40  |
| Choledocholithiasis with chronic cholecystitis         | K80.40  | K80.40  |
| Cholelithiasis and cholecystitis with obstruction      | K80.19  | K80.19  |
| Choleperitonitis                                       | K65.3   | K65.3   |
| Chronic cholangitis                                    | K83.0   | K83.0   |
| Chronic inflammatory disease of uterus                 | N71.1   | N71.1   |
| Chronic oophoritis                                     | N70.12  | N70.12  |
| Chronic parametritis and pelvic cellulitis             | N73.1   | N73.1   |
| Chronic prostatitis                                    | N41.1   | N41.1   |
| Chronic salpingitis                                    | N70.11  | N70.11  |
| Chronic salpingitis and oophoritis                     | N70.13  | N70.13  |
| Clinical sepsis                                        | A41.9   | A41.9   |
| Community acquired bacterial pneumonia                 | J15.9   | J15.9   |
| Community acquired pneumonia                           | J18.9   | J18.9   |
| Consolidation of right upper lobe                      | J18.1   | J18.1   |
| Crohn's colitis, with abscess                          | K50.114 | K50.114 |
| Crohn's disease of colon, with abscess                 | K50.114 | K50.114 |
| Cystitis                                               | N30.90  | N30.90  |
| Cystitis with hematuria                                | N30.91  | N30.91  |

|  |                                                                                                    |        |        |
|--|----------------------------------------------------------------------------------------------------|--------|--------|
|  | Dieulafoy lesion of intestine                                                                      | K63.81 | K63.81 |
|  | Disease of biliary tract, unspecified                                                              | K83.9  | K83.9  |
|  | Disease of intestine, unspecified                                                                  | K63.9  | K63.9  |
|  | Diverticulitis of both small and large intestine<br>with perforation and abscess with bleeding     | K57.41 | K57.41 |
|  | Diverticulitis of both small and large intestine<br>with perforation and abscess without bleeding  | K57.40 | K57.40 |
|  | Diverticulitis of intestine with abscess                                                           | K57.80 | K57.80 |
|  | Diverticulitis of intestine with abscess without<br>bleeding                                       | K57.80 | K57.80 |
|  | Diverticulitis of intestine with abscess without<br>bleeding, unspecified part of intestinal tract | K57.80 | K57.80 |
|  | Diverticulitis of intestine with perforation and<br>abscess                                        | K57.80 | K57.80 |
|  | Diverticulitis of intestine with perforation and<br>abscess without bleeding                       | K57.80 | K57.80 |
|  | Diverticulitis of large intestine with abscess<br>with bleeding                                    | K57.21 | K57.21 |
|  | Diverticulitis of large intestine with abscess<br>without bleeding                                 | K57.20 | K57.20 |
|  | Diverticulitis of large intestine without<br>perforation or abscess with bleeding                  | K57.33 | K57.33 |
|  | Diverticulitis of large intestine without<br>perforation or abscess without bleeding               | K57.32 | K57.32 |

|                                                                                                  |        |        |
|--------------------------------------------------------------------------------------------------|--------|--------|
| Diverticulitis of small intestine with perforation and abscess with bleeding                     | K57.01 | K57.01 |
| Diverticulitis of small intestine with perforation and abscess without bleeding                  | K57.00 | K57.00 |
| Diverticulitis of small intestine without perforation or abscess with bleeding                   | K57.11 | K57.11 |
| Diverticulitis of small intestine without perforation or abscess with bleeding                   | K57.13 | K57.13 |
| Diverticulitis of small intestine without perforation or abscess without bleeding                | K57.10 | K57.10 |
| Diverticulitis of small intestine without perforation or abscess without bleeding                | K57.12 | K57.12 |
| Diverticulosis of both small and large intestine without perforation or abscess without bleeding | K57.50 | K57.50 |
| Diverticulosis of large intestine without perforation or abscess with bleeding                   | K57.31 | K57.31 |
| Diverticulosis of large intestine without perforation or abscess without bleeding                | K57.30 | K57.30 |
| Emphysematous cystitis                                                                           | N30.80 | N30.80 |
| Enterobacter cloacae pneumonia                                                                   | J15.6  | J15.6  |
| Enterococcal sepsis                                                                              | A41.81 | A41.81 |
| Enteroptosis                                                                                     | K63.4  | K63.4  |
| Female acute pelvic peritonitis                                                                  | N73.3  | N73.3  |
| Female chronic pelvic peritonitis                                                                | N73.4  | N73.4  |

|                                                    |                |                |
|----------------------------------------------------|----------------|----------------|
| Female pelvic inflammatory disease, unspecified    | N73.9          | N73.9          |
| Female pelvic peritoneal adhesions (postinfective) | N73.6          | N73.6          |
| Female pelvic peritonitis, unspecified             | N73.5          | N73.5          |
| Fistula of bile duct                               | K83.3          | K83.3          |
| Fistula of intestine                               | K63.2          | K63.2          |
| Gram negative sepsis                               | A41.50         | A41.50         |
| Gram-negative pneumonia                            | J15.6          | J15.6          |
| Gram-positive septic shock                         | A41.89, R65.21 | A41.89, R65.21 |
| Granulomatous prostatitis                          | N41.4          | N41.4          |
| HAP (hospital-acquired pneumonia)                  | J18.9          | J18.9          |
| HCAP (healthcare-associated pneumonia)             | J18.9          | J18.9          |
| Healthcare associated bacterial pneumonia          | J15.9          | J15.9          |
| Healthcare-associated pneumonia                    | J18.9          | J18.9          |
| Hemorrhagic cystitis                               | N30.91         | N30.91         |
| Hospital acquired PNA                              | J18.9          | J18.9          |
| Hospital-acquired bacterial pneumonia              | J15.9          | J15.9          |
| Hospital-acquired pneumonia                        | J18.9          | J18.9          |
| Hypostatic pneumonia, unspecified organism         | J18.2          | J18.2          |
| IC (interstitial cystitis)                         | N30.10         | N30.10         |
| Inflammatory disease of cervix                     | N72            | N72            |
| Inflammatory disease of prostate, unspecified      | N41.9          | N41.9          |
| Inflammatory disease of uterus, unspecified        | N71.9          | N71.9          |
| Influenza with pneumonia                           | J10.0          | J10.0          |

|                                                              |                 |                 |
|--------------------------------------------------------------|-----------------|-----------------|
| Interstitial cystitis                                        | N30.10          | N30.10          |
| Interstitial cystitis (chronic) with hematuria               | N30.11          | N30.11          |
| Intestinal diverticular abscess                              | K63.0           | K63.0           |
| Intra-abdominal abscess                                      | K65.1           | K65.1           |
| Intra-abdominal abscess post-procedure                       | T81.4XXA, K65.1 | T81.4XXA, K65.1 |
| Intra-abdominal abscess post-procedure, initial encounter    | T81.4XXA, K65.1 | T81.4XXA, K65.1 |
| Intraperitoneal abscess                                      | K65.1           | K65.1           |
| Irradiation cystitis with hematuria                          | N30.41          | N30.41          |
| Irradiation cystitis without hematuria                       | N30.40          | N30.40          |
| Left lower lobe pneumonia                                    | J18.9           | J18.9           |
| Left upper lobe pneumonia                                    | J18.9           | J18.9           |
| Line sepsis                                                  | T82.7XXA        | T82.7XXA        |
| Lingular pneumonia                                           | J18.9           | J18.9           |
| LLL pneumonia                                                | J18.9           | J18.9           |
| Lobar pneumonia                                              | J18.1           | J18.1           |
| Loculated pleural effusion                                   | J90             | J90             |
| Lung abscess                                                 | J85.2           | J85.2           |
| Malignant pleural effusion                                   | J91.0           | J91.0           |
| MRSA (methicillin resistant staphylococcus aureus) pneumonia | J15.212         | J15.212         |
| MRSA pneumonia                                               | J15.212         | J15.212         |
| Multiple lung abscesses                                      | J85.2           | J85.2           |
| Necrotizing pneumonia                                        | J85.0           | J85.0           |
| Neutropenic sepsis                                           | A41.9, D70.9    | A41.9, D70.9    |

|                                                                                |        |        |
|--------------------------------------------------------------------------------|--------|--------|
| Nursing home pneumonia                                                         | J18.9  | J18.9  |
| Nursing home-acquired pneumonia                                                | J18.9  | J18.9  |
| Obstruction of bile duct                                                       | K83.1  | K83.1  |
| Obstructive pneumonia                                                          | J18.9  | J18.9  |
| Oophoritis, unspecified                                                        | N70.92 | N70.92 |
| Other cholelithiasis with obstruction                                          | K80.81 | K80.81 |
| Other cholelithiasis without obstruction                                       | K80.80 | K80.80 |
| Other chronic cystitis with hematuria                                          | N30.21 | N30.21 |
| Other chronic cystitis without hematuria                                       | N30.20 | N30.20 |
| Other cystitis with hematuria                                                  | N30.81 | N30.81 |
| Other disorders of retroperitoneum                                             | K68.9  | K68.9  |
| Other inflammatory diseases of prostate                                        | N41.8  | N41.8  |
| Other pneumonia, unspecified organism                                          | J18.8  | J18.8  |
| Other retroperitoneal abscess                                                  | K68.19 | K68.19 |
| Other specified bacterial agents as the cause of diseases classified elsewhere | B96.89 | B96.89 |
| Other specified diseases of biliary tract                                      | K83.8  | K83.8  |
| Other specified diseases of intestine                                          | K63.89 | K63.89 |
| Other specified female pelvic inflammatory disease                             | N73.8  | N73.8  |
| Other streptococcal sepsis                                                     | A40.8  | A40.8  |
| Paracolic abscess                                                              | K63.0  | K63.0  |
| Pelvirectal abscess                                                            | K65.8  | K65.8  |
| Perforation of bile duct                                                       | K83.2  | K83.2  |
| Perforation of intestine (nontraumatic)                                        | K63.1  | K63.1  |

|                                                                       |                |                |
|-----------------------------------------------------------------------|----------------|----------------|
| Perihepatic abscess                                                   | K65.0          | K65.0          |
| Peritoneal abscess                                                    | K65.1          | K65.1          |
| Peritoneal dialysis-associated peritonitis,<br>initial encounter      | T85.71XA       | T85.71XA       |
| Peritonitis                                                           | K65.9          | K65.9          |
| Peritonitis (acute) generalized                                       | K65.0          | K65.0          |
| Peritonitis associated with peritoneal dialysis,<br>initial encounter | T85.71XA       | T85.71XA       |
| Peritonitis, acute generalized                                        | K65.0          | K65.0          |
| Peritonitis, dialysis-associated, initial<br>encounter                | T85.71XA       | T85.71XA       |
| Persistent pneumonia                                                  | J18.9          | J18.9          |
| Pleural effusion                                                      | J90            | J90            |
| Pleural effusion in other conditions classified<br>elsewhere          | J91.8          | J91.8          |
| Pleural effusion on left                                              | J90            | J90            |
| Pleural effusion on right                                             | J90            | J90            |
| Pleural effusion, bilateral                                           | J90            | J90            |
| Pleural effusion, left                                                | J90            | J90            |
| Pleural effusion, right                                               | J90            | J90            |
| Pleurisy with effusion                                                | J90            | J90            |
| PNA (pneumonia)                                                       | J18.9          | J18.9          |
| Pneumococcal pneumonia                                                | J13            | J13            |
| Pneumonia                                                             | J18.9          | J18.9          |
| Pneumonia affecting pregnancy                                         | O99.519, J18.9 | O99.519, J18.9 |

|                                                                                                                |                |                |
|----------------------------------------------------------------------------------------------------------------|----------------|----------------|
| Pneumonia affecting pregnancy in second trimester                                                              | O99.512, J18.9 | O99.512, J18.9 |
| Pneumonia due to Escherichia coli                                                                              | J15.5          | J15.5          |
| Pneumonia due to Haemophilus influenzae                                                                        | J14            | J14            |
| Pneumonia due to Klebsiella pneumoniae, unspecified laterality, unspecified part of lung                       | J15.0          | J15.0          |
| Pneumonia due to methicillin resistant Staphylococcus aureus                                                   | J15.212        | J15.212        |
| Pneumonia due to methicillin resistant Staphylococcus aureus, unspecified laterality, unspecified part of lung | J15.212        | J15.212        |
| Pneumonia due to methicillin susceptible Staphylococcus aureus                                                 | J15.211        | J15.211        |
| Pneumonia due to Mycoplasma pneumoniae                                                                         | J15.7          | J15.7          |
| Pneumonia due to organism                                                                                      | J18.9          | J18.9          |
| Pneumonia due to other specified bacteria                                                                      | J15.8          | J15.8          |
| Pneumonia due to other specified infectious organisms                                                          | J16.8          | J16.8          |
| Pneumonia due to other staphylococcus                                                                          | J15.29         | J15.29         |
| Pneumonia due to other streptococci                                                                            | J15.4          | J15.4          |
| Pneumonia due to Pseudomonas                                                                                   | J15.1          | J15.1          |
| Pneumonia due to staphylococcus, unspecified                                                                   | J15.20         | J15.20         |
| Pneumonia due to Streptococcus pneumoniae                                                                      | J13            | J13            |
| Pneumonia in bacterial diseases classified elsewhere                                                           | J17            | J17            |



|                                                                                                                   |         |         |
|-------------------------------------------------------------------------------------------------------------------|---------|---------|
| Pneumonia in diseases classified elsewhere                                                                        | J17     | J17     |
| Pneumonia involving left lung                                                                                     | J18.9   | J18.9   |
| Pneumonia involving right lung                                                                                    | J18.9   | J18.9   |
| Pneumonia of both lower lobes due to<br>Pseudomonas species                                                       | J15.1   | J15.1   |
| Pneumonia of both lower lobes due to<br>Streptococcus pneumoniae                                                  | J13     | J13     |
| Pneumonia of both lungs due to methicillin<br>resistant Staphylococcus aureus (MRSA),<br>unspecified part of lung | J15.212 | J15.212 |
| Pneumonia of left lower lobe due to group B<br>Streptococcus                                                      | J15.3   | J15.3   |
| Pneumonia of left lower lobe due to<br>methicillin susceptible Staphylococcus aureus<br>(MSSA)                    | J15.211 | J15.211 |
| Pneumonia of left lower lobe due to<br>Pseudomonas species                                                        | J15.1   | J15.1   |
| Pneumonia of left lung due to infectious<br>organism, unspecified part of lung                                    | J18.9   | J18.9   |
| Pneumonia of left upper lobe due to<br>methicillin resistant Staphylococcus aureus<br>(MRSA)                      | J15.212 | J15.212 |
| Pneumonia of right lower lobe due to<br>Streptococcus pneumoniae                                                  | J13     | J13     |

|                                                                                   |                 |                 |
|-----------------------------------------------------------------------------------|-----------------|-----------------|
| Pneumonia of right upper lobe due to infectious organism                          | J18.9           | J18.9           |
| Pneumonia of upper lobe due to infectious organism, unspecified laterality        | J18.9           | J18.9           |
| Pneumonia with cavity of lung                                                     | J18.9, J98.4    | J18.9, J98.4    |
| Pneumonia with lung abscess                                                       | J85.1           | J85.1           |
| Pneumonia, aspiration                                                             | J69.0           | J69.0           |
| Pneumonia, bacterial                                                              | J15.9           | J15.9           |
| Pneumonia, community acquired                                                     | J18.9           | J18.9           |
| Pneumonia, lobar                                                                  | J18.1           | J18.1           |
| Pneumonia, organism unspecified                                                   | J18.9           | J18.9           |
| Pneumonia, organism unspecified, unspecified laterality, unspecified part of lung | J18.9           | J18.9           |
| Pneumonia, primary atypical                                                       | J18.9           | J18.9           |
| Pneumonia, unspecified laterality, unspecified part of lung                       | J18.9           | J18.9           |
| Pneumonia, unspecified organism                                                   | J18.9           | J18.9           |
| Pneumonitis                                                                       | J18.9           | J18.9           |
| Polyp of colon                                                                    | K63.5           | K63.5           |
| Post procedural retroperitoneal abscess                                           | K68.11          | K68.11          |
| Postobstructive pneumonia                                                         | J18.9           | J18.9           |
| Postoperative intra-abdominal abscess                                             | T81.4XXA, K65.1 | T81.4XXA, K65.1 |
| Postoperative intra-abdominal abscess, initial encounter                          | T81.4XXA, K65.1 | T81.4XXA, K65.1 |
| Probable sepsis                                                                   | A41.9           | A41.9           |

|                                         |              |              |
|-----------------------------------------|--------------|--------------|
| Prostatocystitis                        | N41.3        | N41.3        |
| Pseudomonal pneumonia                   | J15.1        | J15.1        |
| Pseudomonas pneumonia                   | J15.1        | J15.1        |
| Psoas muscle abscess                    | K68.12       | K68.12       |
| Pulmonary abscess                       | J85.2        | J85.2        |
| Pyelonephritis                          | N12          | N12          |
| Pyelonephritis, acute                   | N10          | N10          |
| Recurrent cystitis                      | N30.90       | N30.90       |
| Recurrent left pleural effusion         | J90          | J90          |
| Recurrent pleural effusion on left      | J90          | J90          |
| Recurrent pleural effusion on right     | J90          | J90          |
| Recurrent pneumonia                     | J18.9        | J18.9        |
| Recurrent pyelonephritis                | N12          | N12          |
| Recurrent right pleural effusion        | J90          | J90          |
| Recurrent urosepsis                     | A41.9, N39.0 | A41.9, N39.0 |
| Right lower lobe pneumonia              | J18.9        | J18.9        |
| Right lower lobe pneumonitis            | J18.9        | J18.9        |
| Right lower quadrant abdominal abscess  | K65.1        | K65.1        |
| Right middle lobe pneumonia             | J18.9        | J18.9        |
| Right upper lobe pneumonia              | J18.9        | J18.9        |
| RLL pneumonia                           | J18.9        | J18.9        |
| RML pneumonia                           | J18.9        | J18.9        |
| Salpingitis and oophoritis, unspecified | N70.93       | N70.93       |
| Salpingitis, unspecified                | N70.91       | N70.91       |
| SBP (spontaneous bacterial peritonitis) | K65.2        | K65.2        |

|                                                                     |               |               |
|---------------------------------------------------------------------|---------------|---------------|
| Sclerosing cholangitis                                              | K83.0         | K83.0         |
| Sclerosing mesenteritis                                             | K65.4         | K65.4         |
| SEPSIS                                                              | A41.9         | A41.9         |
| Sepsis affecting skin                                               | L02.91        | L02.91        |
| Sepsis associated hypotension                                       | A41.9         | A41.9         |
| Sepsis due to Actinomyces                                           | A42.7         | A42.7         |
| Sepsis due to cellulitis                                            | L03.90, A41.9 | L03.90, A41.9 |
| Sepsis due to enterococcus                                          | A41.81        | A41.81        |
| Sepsis due to Escherichia coli                                      | A41.51        | A41.51        |
| Sepsis due to Gram negative bacteria                                | A41.50        | A41.50        |
| Sepsis due to group A Streptococcus                                 | A40.0         | A40.0         |
| Sepsis due to group B Streptococcus                                 | A40.1         | A40.1         |
| Sepsis due to Haemophilus influenzae                                | A41.3         | A41.3         |
| Sepsis due to Klebsiella                                            | A41.4         | A41.4         |
| Sepsis due to methicillin resistant<br>Staphylococcus aureus        | A41.02        | A41.02        |
| Sepsis due to methicillin resistant<br>Staphylococcus aureus (MRSA) | A41.02        | A41.02        |
| Sepsis due to Methicillin susceptible<br>Staphylococcus aureus      | A41.01        | A41.01        |
| Sepsis due to other specified staphylococcus                        | A41.1         | A41.1         |
| Sepsis due to pneumonia                                             | J18.9, A41.9  | J18.9, A41.9  |
| Sepsis due to Pseudomonas species                                   | A41.52        | A41.52        |
| Sepsis due to Serratia                                              | A41.53        | A41.53        |
| Sepsis due to Staphylococcus aureus                                 | A41.01        | A41.01        |

|                                              |                 |                 |
|----------------------------------------------|-----------------|-----------------|
| Sepsis due to Streptococcus pneumoniae       | A40.3           | A40.3           |
| Sepsis due to Streptococcus, group A         | A40.0           | A40.0           |
| Sepsis due to Streptococcus, group B         | A40.1           | A40.1           |
| Sepsis due to urinary tract infection        | A41.9, N39.0    | A41.9, N39.0    |
| Sepsis following intra-abdominal surgery     | T81.4XXA, A41.9 | T81.4XXA, A41.9 |
| Sepsis secondary to UTI                      | A41.9, N39.0    | A41.9, N39.0    |
| Sepsis with acute organ dysfunction          | A41.9, R65.20   | A41.9, R65.20   |
| Sepsis with hypotension                      | A41.9           | A41.9           |
| Sepsis with multiple organ dysfunction (MOD) | A41.9, R65.20   | A41.9, R65.20   |
| Sepsis(995.91)                               | A41.9           | A41.9           |
| Sepsis, due to unspecified organism          | A41.9           | A41.9           |
| Sepsis, Gram positive                        | A41.89          | A41.89          |
| Sepsis, unspecified organism                 | A41.9           | A41.9           |
| Sepsis, urinary                              | A41.9, N39.0    | A41.9, N39.0    |
| Septic shock                                 | A41.9, R65.21   | A41.9, R65.21   |
| Septic shock due to urinary tract infection  | N39.0, R65.21   | N39.0, R65.21   |
| Septic shock(785.52)                         | R65.21          | R65.21          |
| Septicemia due to E. coli                    | A41.51          | A41.51          |
| Septicemia due to Enterobacter               | A41.59          | A41.59          |
| Septicemic shock                             | A41.9, R65.21   | A41.9, R65.21   |
| Severe sepsis                                | A41.9, R65.20   | A41.9, R65.20   |
| Severe sepsis with acute organ dysfunction   | A41.9, R65.20   | A41.9, R65.20   |
| Severe sepsis with septic shock              | A41.9, R65.21   | A41.9, R65.21   |
| Severe sepsis without septic shock           | A41.9, R65.20   | A41.9, R65.20   |

|  |                                                |              |              |
|--|------------------------------------------------|--------------|--------------|
|  | Severe sepsis(995.92)                          | R65.20       | R65.20       |
|  | Solids, liquids, NEC aspiration                | J69.8        | J69.8        |
|  | Spasm of sphincter of Oddi                     | K83.4        | K83.4        |
|  | Spontaneous bacterial peritonitis              | K65.2        | K65.2        |
|  | Staphylococcal sepsis                          | A41.2        | A41.2        |
|  | Staphylococcus aureus bacteremia with sepsis   | A41.01       | A41.01       |
|  | Staphylococcus aureus sepsis                   | A41.01       | A41.01       |
|  | Streptococcal sepsis                           | A40.9        | A40.9        |
|  | Subhepatic abscess                             | K65.1        | K65.1        |
|  | Subphrenic abscess                             | K65.1        | K65.1        |
|  | Trigonitis with hematuria                      | N30.31       | N30.31       |
|  | Trigonitis without hematuria                   | N30.30       | N30.30       |
|  | Ulcer of intestine                             | K63.3        | K63.3        |
|  | Unspecified parametritis and pelvic cellulitis | N73.2        | N73.2        |
|  | Unspecified pleural effusion                   | J90          | J90          |
|  | Urinary sepsis                                 | A41.9, N39.0 | A41.9, N39.0 |
|  | Urinary tract infection, site not specified    | N39.0        | N39.0        |
|  | Urosepsis                                      | A41.9, N39.0 | A41.9, N39.0 |
|  | Ventilator associated interstitial             | J95.851      | J95.851      |
|  | Viral aspiration                               | J12.9        | J12.9        |
